# Supplementary material for: 3D Ultrasound Measurements Are Highly Sensitive to Monitor Formation and Progression of Abdominal Aortic Aneurysms in Mouse Models
Source: PubMed Central journal article supplement (PMC9314770; doi:10.3389/fcvm.2022.944180), 2022-07-12

## *Supplementary Material*

# **3D Ultrasound Measurements Are Highly Sensitive to Monitor Formation and Progression of Abdominal Aortic Aneurysms in Mouse Models**

**Nahla Ibrahim<sup>1</sup>, Sonja Bleichert<sup>1</sup>, Johannes Klopff<sup>1</sup>, Gabriel Kurzreiter<sup>1</sup>, Viktoria Knöbl<sup>1</sup>, Hubert Hayden<sup>1</sup>, Albert Busch<sup>2</sup>, Alexander Stiglbauer-Tscholakoff<sup>3</sup>, Wolf Eilenberg<sup>1</sup>, Christoph Neumayer<sup>1</sup>, Marc A. Bailey<sup>4,5</sup>, and Christine Brostjan<sup>1\*</sup>**

<sup>1</sup>Division of Vascular Surgery, Department of General Surgery, Medical University of Vienna and Vienna General Hospital, Vienna, Austria

<sup>2</sup>Department for Visceral, Thoracic and Vascular Surgery, Technical University of Dresden and University Hospital Carl-Gustav Carus, Dresden, Germany

<sup>3</sup>Division of Cardiovascular and Interventional Radiology, Division of Molecular and Gender Imaging, Department of Biomedical Imaging and Image Guided Therapy, Medical University of Vienna and Vienna General Hospital, Vienna, Austria

<sup>4</sup>Leeds Institute for Cardiovascular and Metabolic Medicine, School of Medicine, University of Leeds, Leeds, United Kingdom

<sup>5</sup>Leeds Vascular Institute, Leeds General Infirmary, Great George Street, Leeds, United Kingdom

**\* Correspondence:**

Prof. Christine Brostjan, PhD

[christine.brostjan@meduniwien.ac.at](mailto:christine.brostjan@meduniwien.ac.at)

**SUPPLEMENTARY FIGURE LEGENDS**

**Suppl. Figure 1: Interobserver correlations in the AngII model regarding four aortic parameters in 3D ultrasound analysis.** A | Absolute volume [mm<sup>3</sup>]. B | Absolute diameter [mm]. C | Relative volume [% of baseline]. D | Relative diameter [% of baseline]. Spearman coefficient of correlation  $r$  and Lin's concordance correlation coefficient  $\rho$  with 95% confidence intervals (95% CI) are given.

**Suppl. Figure 2: Interobserver correlations in the ePPE model regarding four aortic parameters in 3D ultrasound analysis.** A | Absolute volume [mm<sup>3</sup>]. B | Absolute diameter [mm]. C | Relative volume [% of baseline]. D | Relative diameter [% of baseline]. Spearman coefficient of correlation  $r$  and Lin's concordance correlation coefficient  $\rho$  with 95% confidence intervals (95% CI) are given.

**Suppl. Figure 3: Interobserver correlations in the ePPE+BAPN model regarding four aortic parameters in 3D ultrasound analysis.** A | Absolute volume [mm<sup>3</sup>]. B | Absolute diameter [mm]. C | Relative volume [% of baseline]. D | Relative diameter [% of baseline]. Spearman coefficient of correlation  $r$  and Lin's concordance correlation coefficient  $\rho$  with 95% confidence intervals (95% CI) are given.

**Suppl. Figure 4: Interobserver correlations in the PPE model regarding four aortic parameters in 3D ultrasound analysis.** A | Absolute volume [mm<sup>3</sup>]. B | Absolute diameter [mm]. C | Relative volume [% of baseline]. D | Relative diameter [% of baseline]. Spearman coefficient of correlation  $r$  and Lin's concordance correlation coefficient  $\rho$  with 95% confidence intervals (95% CI) are given.

**Suppl. Figure 5: Interobserver differences depicted by Bland Altman plots for the AngII model regarding four aortic parameters in 3D ultrasound analysis.** A | Absolute volume [mm<sup>3</sup>]. B | Absolute diameter [mm]. C | Relative volume [% of baseline]. D | Relative diameter [% of baseline].

**Suppl. Figure 6: Interobserver differences depicted by Bland Altman plots for the ePPE model regarding four aortic parameters in 3D ultrasound analysis.** A | Absolute volume [mm<sup>3</sup>]. B | Absolute diameter [mm]. C | Relative volume [% of baseline]. D | Relative diameter [% of baseline].

**Suppl. Figure 7: Interobserver differences depicted by Bland Altman plots for the ePPE+BAPN model regarding four aortic parameters in 3D ultrasound analysis.** A | Absolute volume [mm<sup>3</sup>]. B | Absolute diameter [mm]. C | Relative volume [% of baseline]. D | Relative diameter [% of baseline].

**Suppl. Figure 8: Interobserver differences depicted by Bland Altman plots for the PPE model regarding four aortic parameters in 3D ultrasound analysis.** A | Absolute volume [mm<sup>3</sup>]. B | Absolute diameter [mm]. C | Relative volume [% of baseline]. D | Relative diameter [% of baseline].

**Suppl. Figure 9: Development of suprarenal AAAs over time in the AngII model.** The development of a suprarenal AAA over time was investigated in the AngII model as measured by A | absolute volume [mm<sup>3</sup>], B | absolute diameter [mm], C | relative volume [% of baseline] and D | relative diameter [% of baseline]. Displayed are mean  $\pm$  standard deviation and single data points (n=38/23/23 mice). LMEM analysis with time as metric covariate is summarized by beta values (fixed effect estimates), 95% confidence limits (95% CI) and random effect variance. P-values indicated in graphs by \* p<0.05, \*\* p<0.01, \*\*\* p<0.001 refer to LMEM analysis with time as categorical factor for comparison of individual time points.

**Suppl. Figure 10: Development of infrarenal AAAs over time in the ePPE model.** The development of an infrarenal AAA over time was investigated in the ePPE model (n=20 mice) as measured by A | absolute volume [mm<sup>3</sup>], B | absolute diameter [mm], C | relative volume [% of baseline] and D | relative diameter [% of baseline]. LMEM analysis with time as metric covariate is summarized by beta values (fixed effect estimates), 95% confidence limits (95% CI) and random effect variance. P-values indicated in graphs by \* p<0.05, \*\* p<0.01, \*\*\* p<0.001 refer to LMEM analysis with time as categorical factor for comparison of individual time points.

**Suppl. Figure 11: Development of infrarenal AAAs over time in the ePPE+BAPN model.** The development of an infrarenal AAA over time was investigated in the ePPE+BAPN model (n=8 mice) as measured by A | absolute volume [mm<sup>3</sup>], B | absolute diameter [mm], C | relative volume [% of baseline] and D | relative diameter [% of baseline]. LMEM analysis with time as metric covariate is summarized by beta values (fixed effect estimates), 95% confidence limits (95% CI) and random effect variance. P-values indicated in graphs by \* p<0.05, \*\* p<0.01, \*\*\* p<0.001 refer to LMEM analysis with time as categorical factor for comparison of individual time points.

**Suppl. Figure 12: Development of infrarenal AAAs over time in the PPE model.** The development of an infrarenal AAA over time was investigated in the PPE model as measured by A | absolute volume [mm<sup>3</sup>], B | absolute diameter [mm], C | relative volume [% of baseline] and D | relative diameter [% of baseline]. Displayed are mean  $\pm$  standard deviation and single data points (n=17/10/10 mice). LMEM analysis with time as metric covariate is summarized by beta values (fixed effect estimates), 95% confidence limits (95% CI) and random effect variance. P-values indicated in graphs by \* p<0.05, \*\* p<0.01, \*\*\* p<0.001 refer to LMEM analysis with time as categorical factor for comparison of individual time points (ns, not significant).

**Suppl. Figure 13: *Ex vivo* measurements of AAA volume compared to ultrasound derived aneurysm volume.** The correlation between aneurysm volume as measured by 3D US or determined *ex vivo* by serial diameter measurements in the A | AngII model (n=25) and B | PPE model (n=7) were evaluated by Spearman coefficient of correlation.

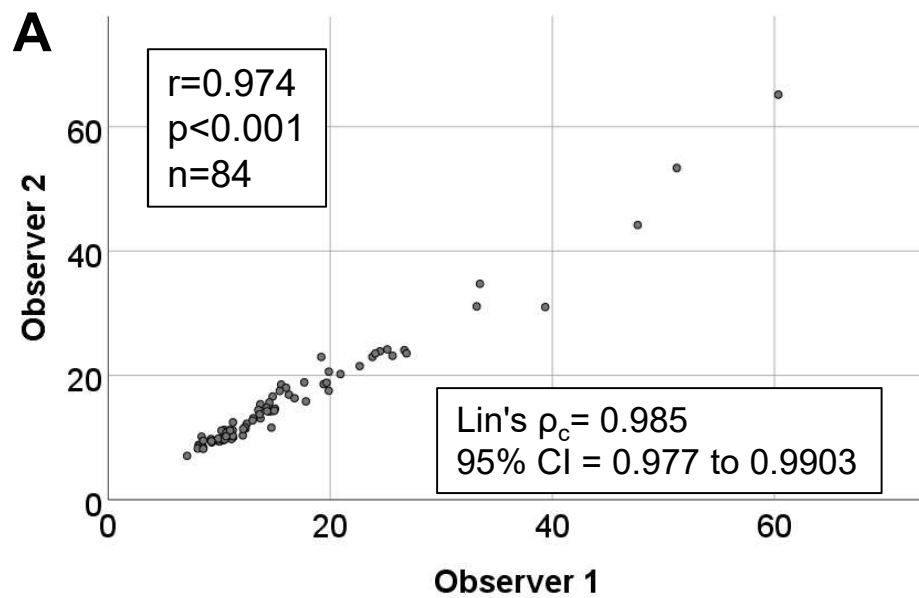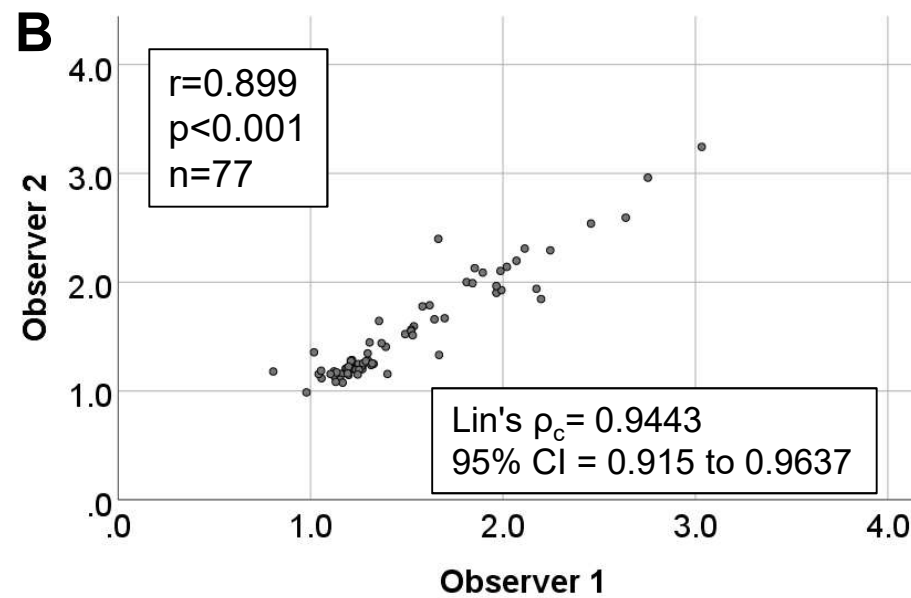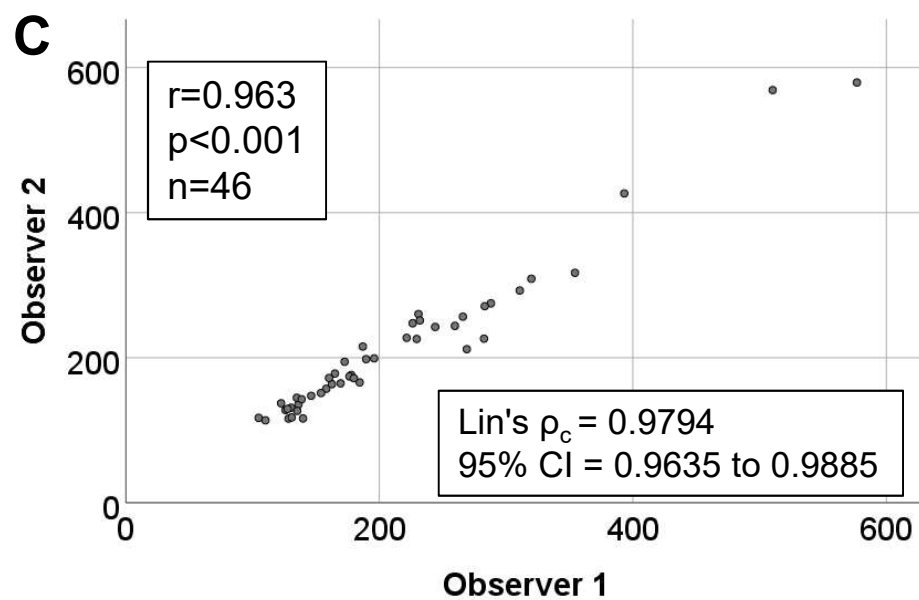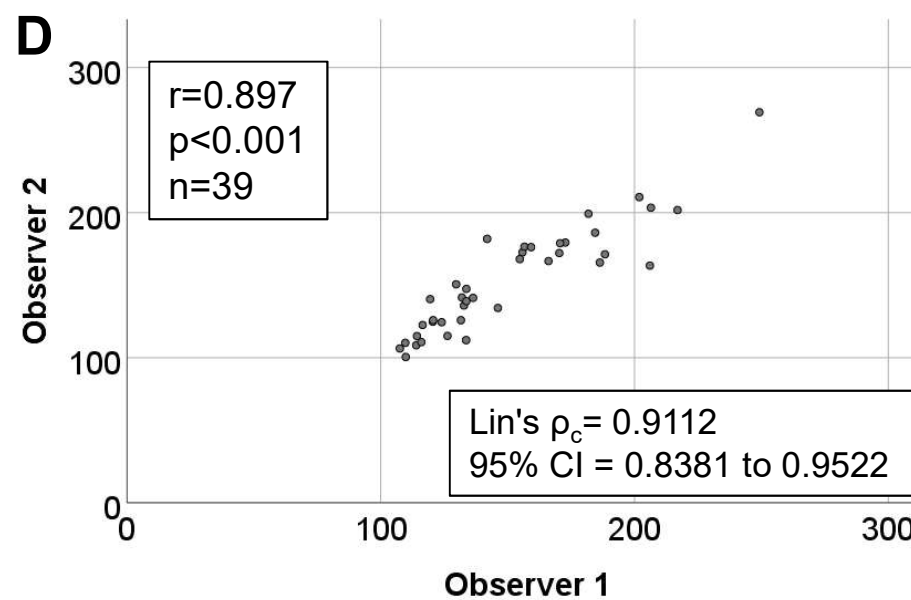

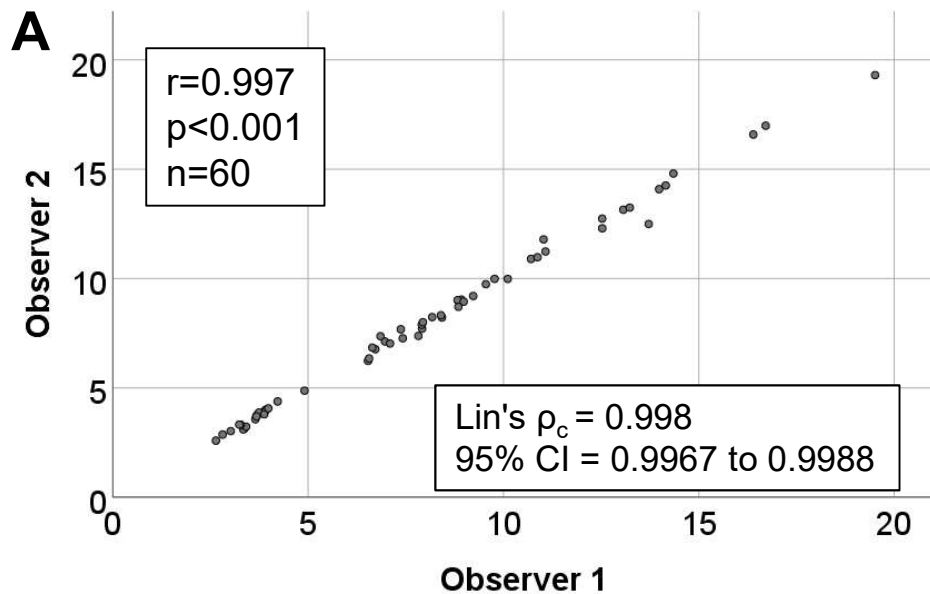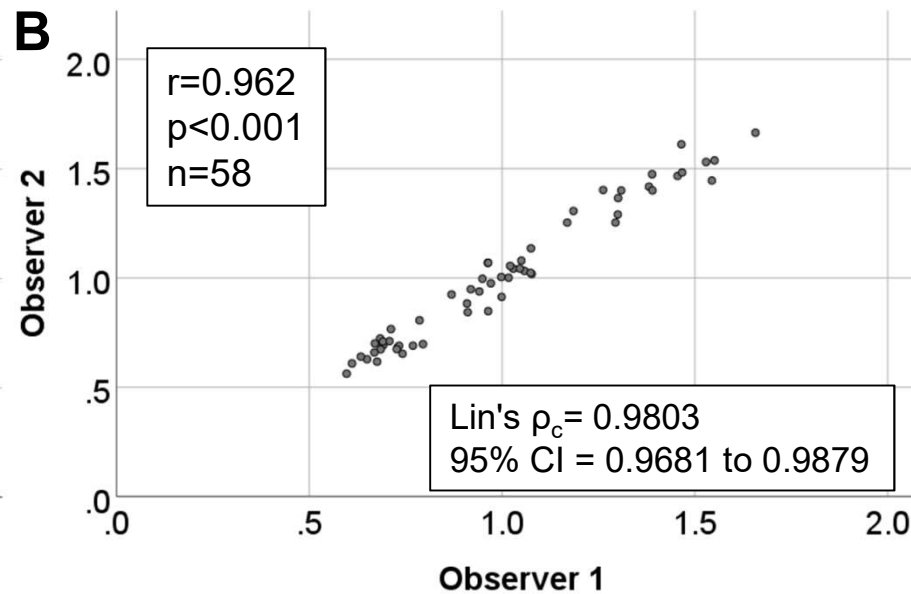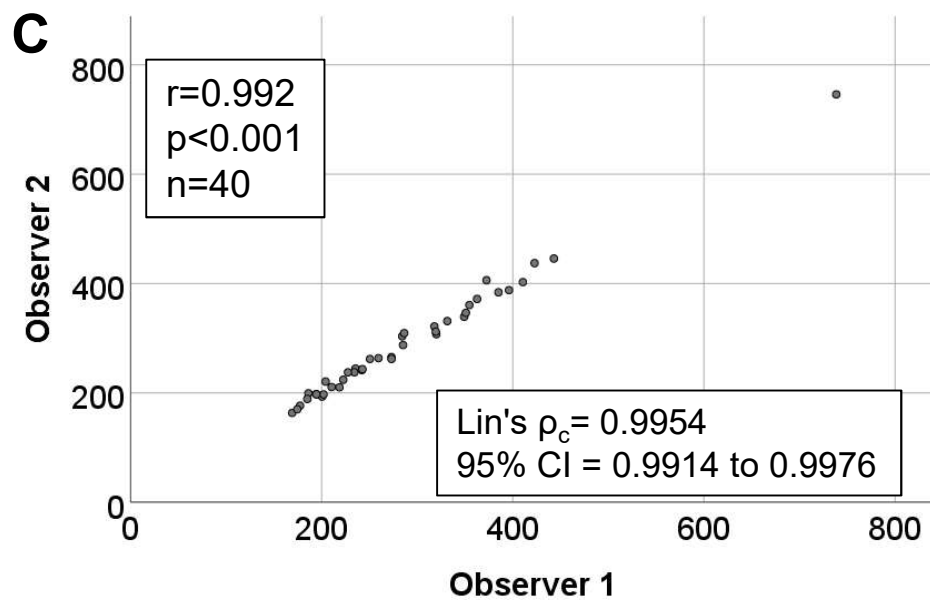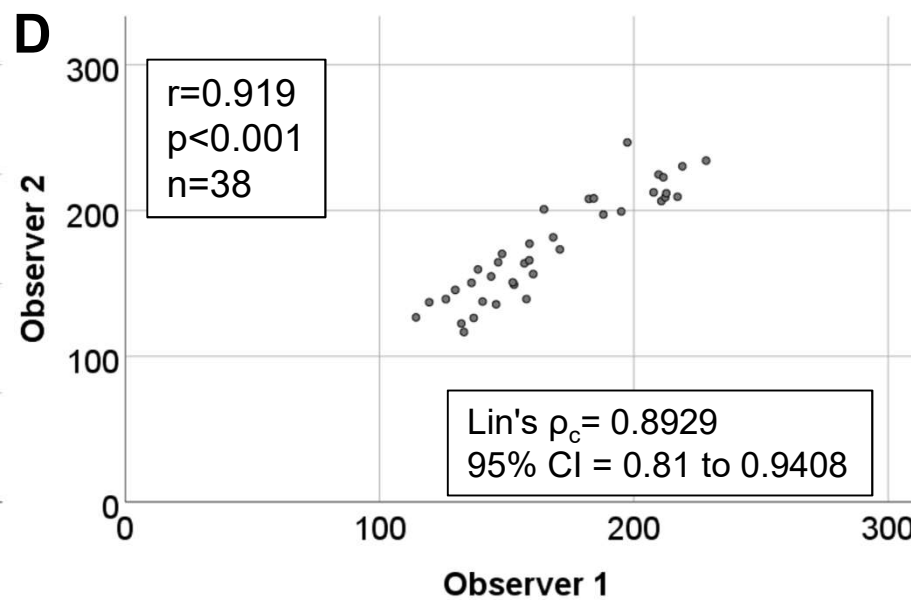

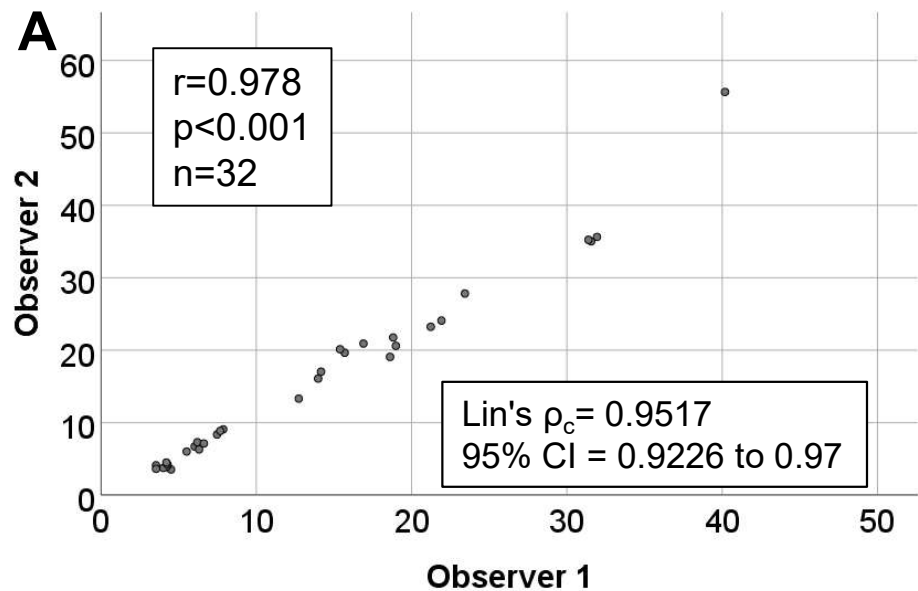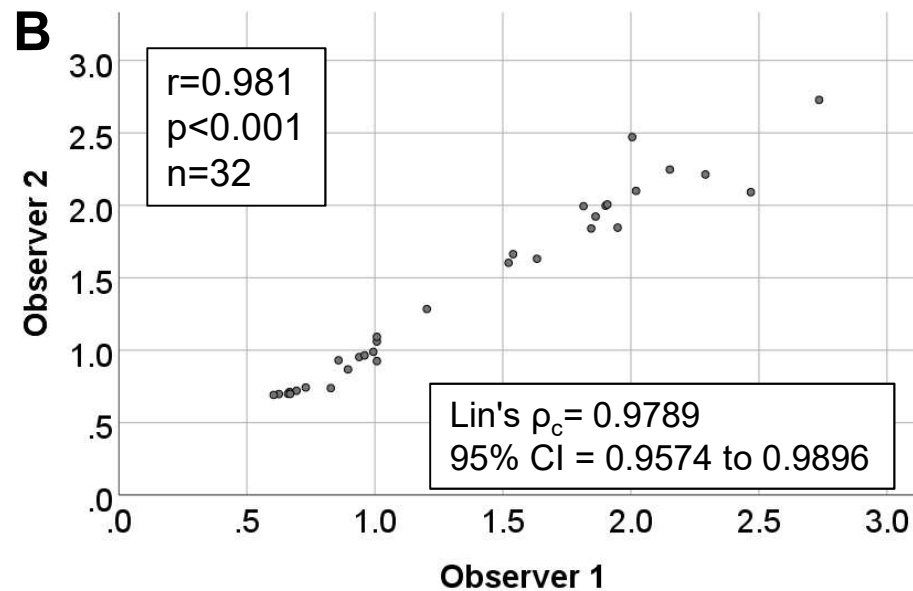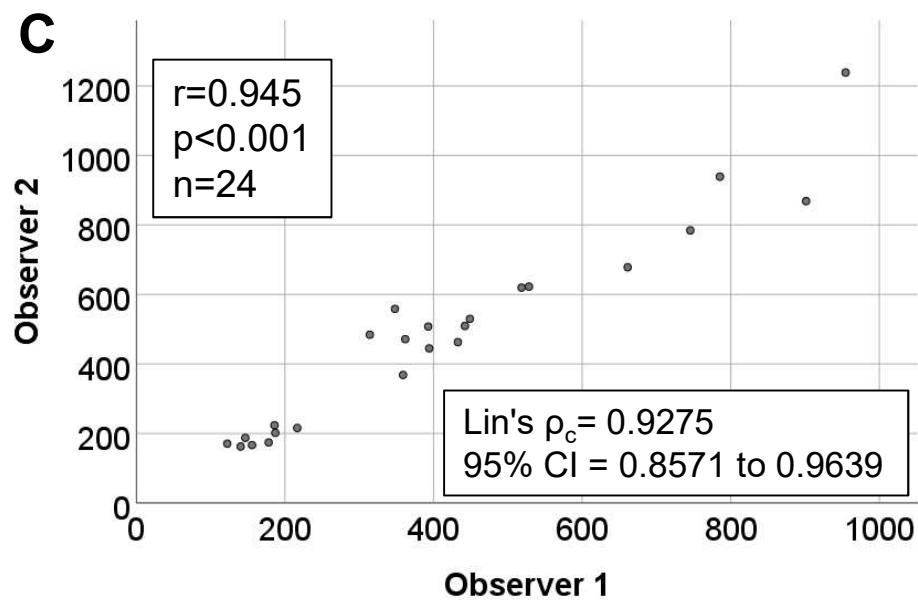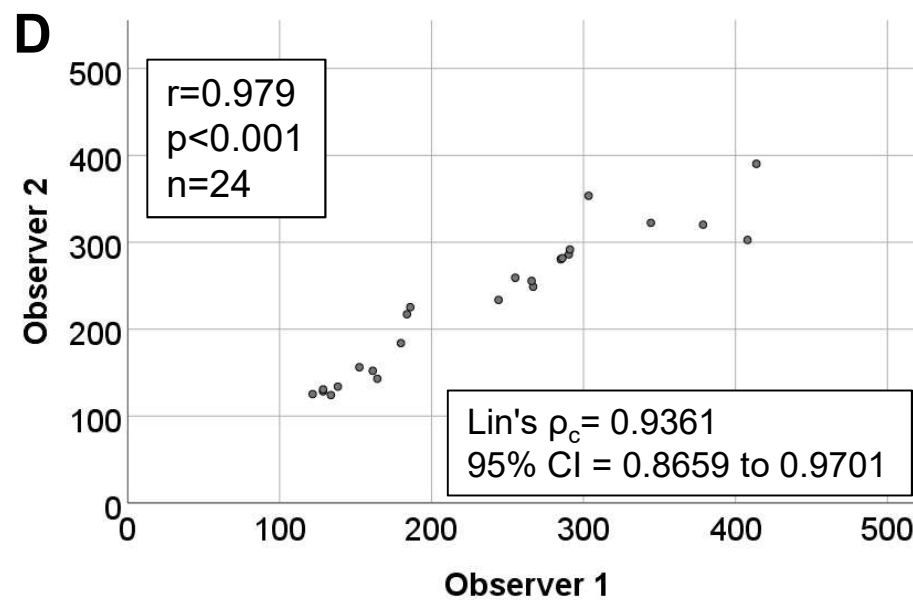

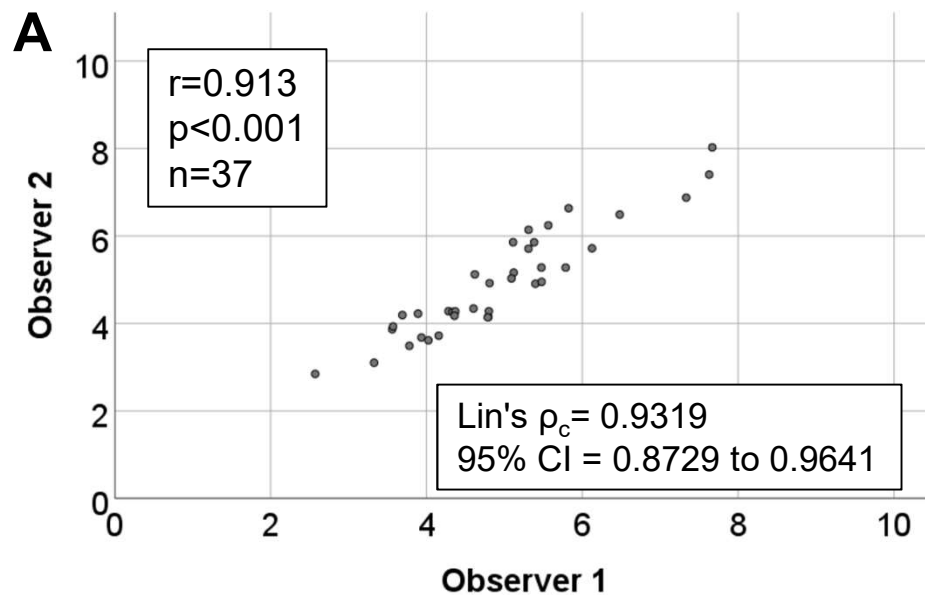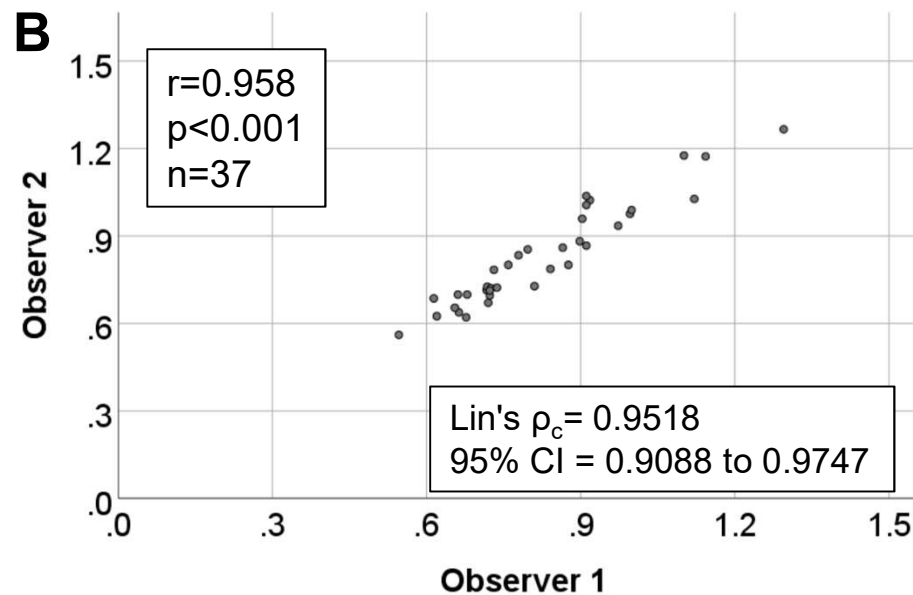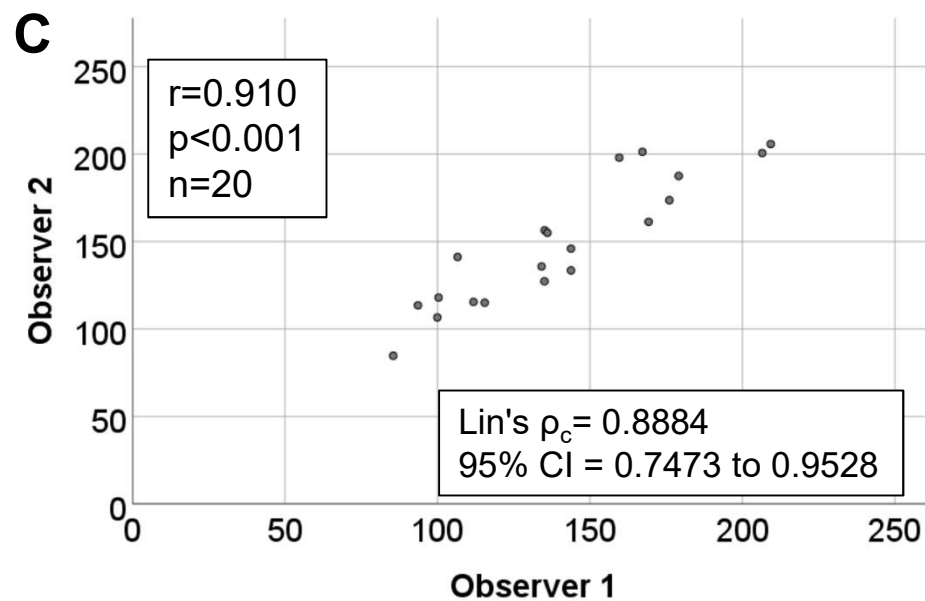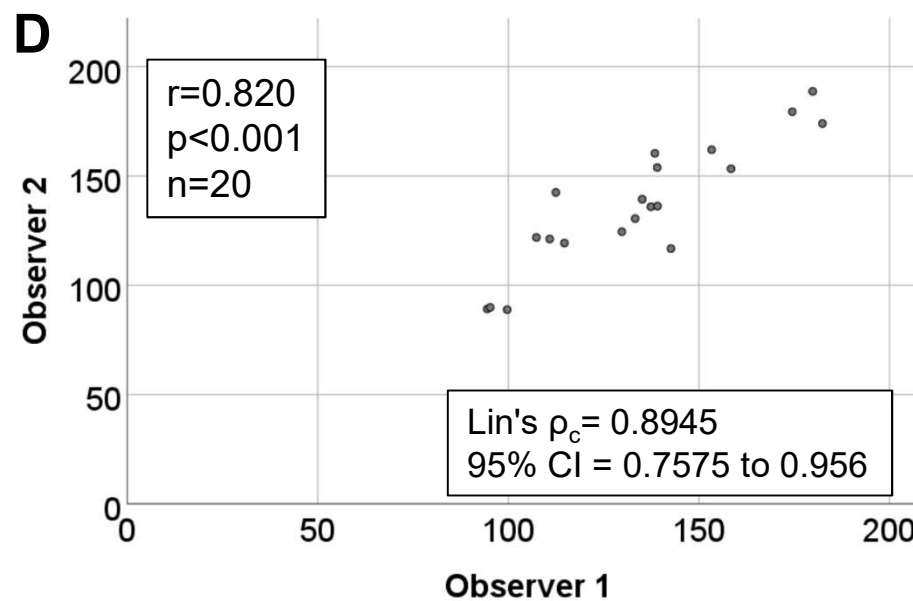

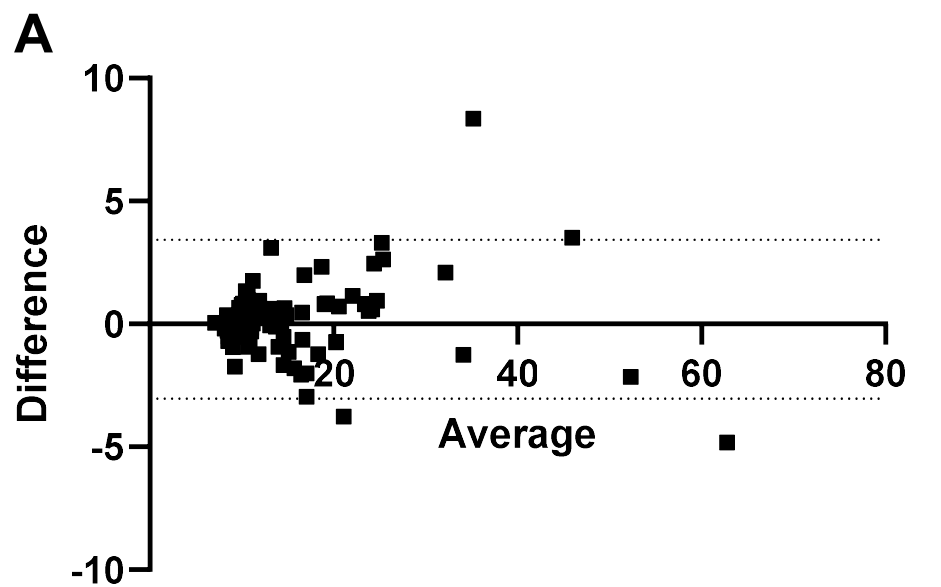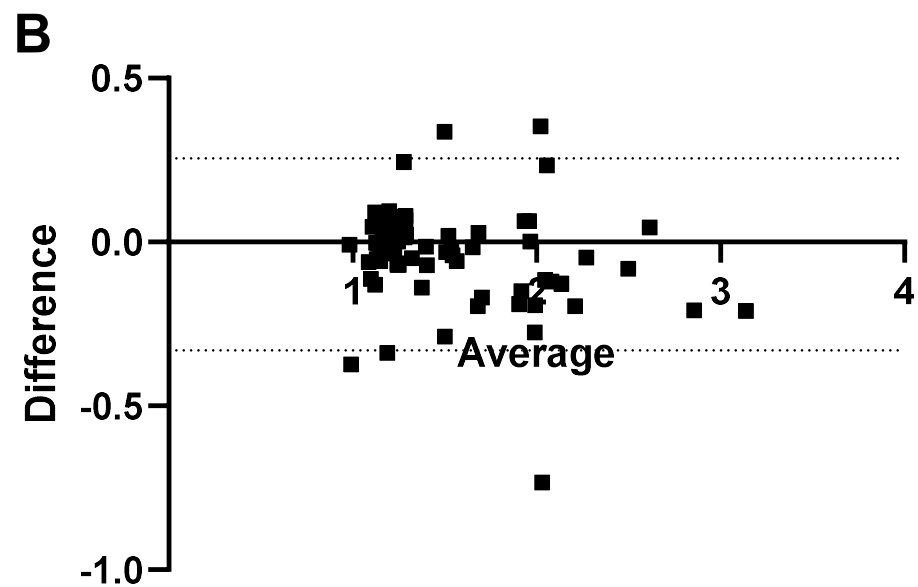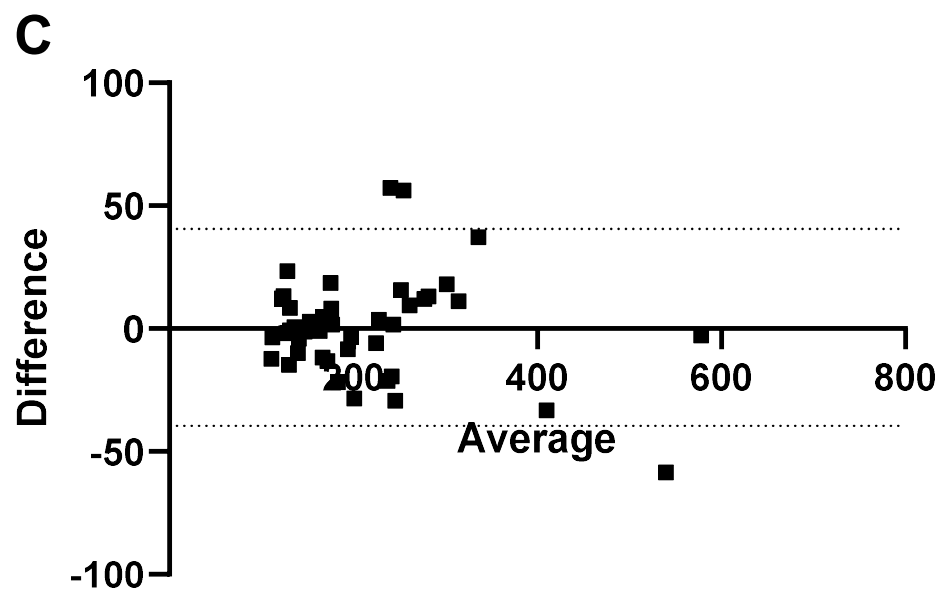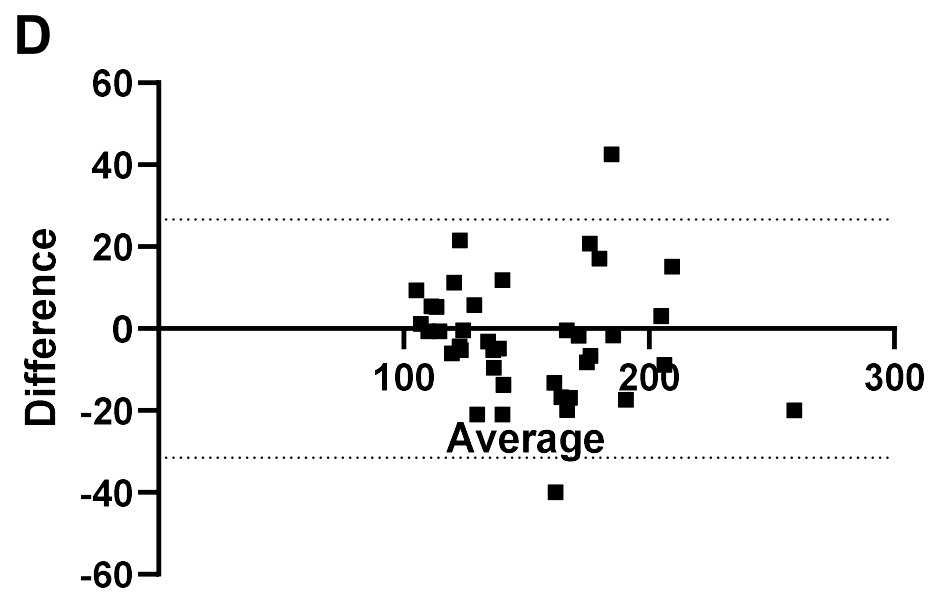



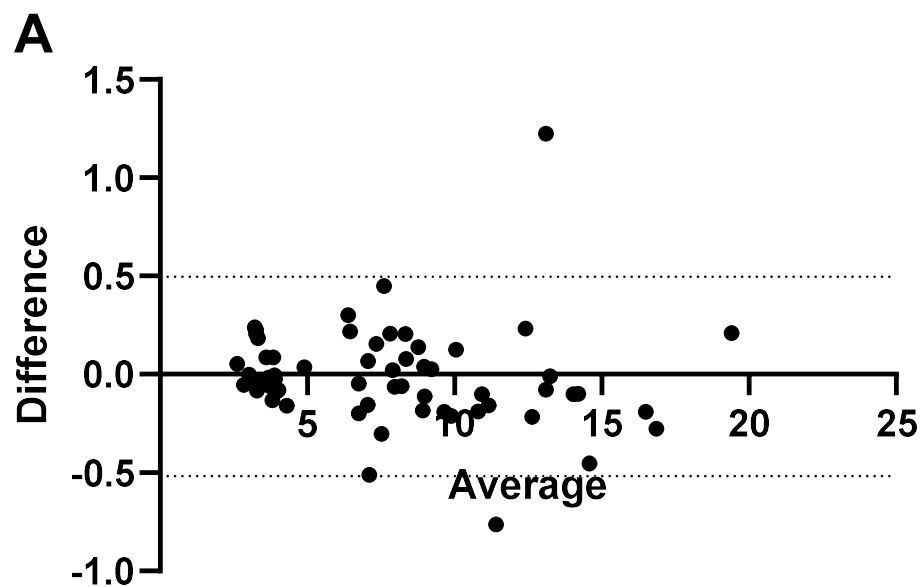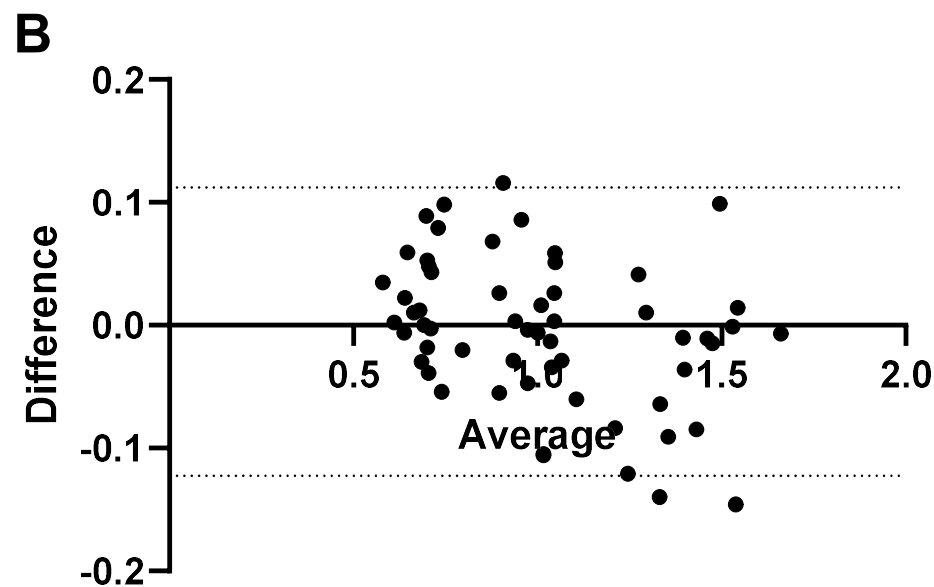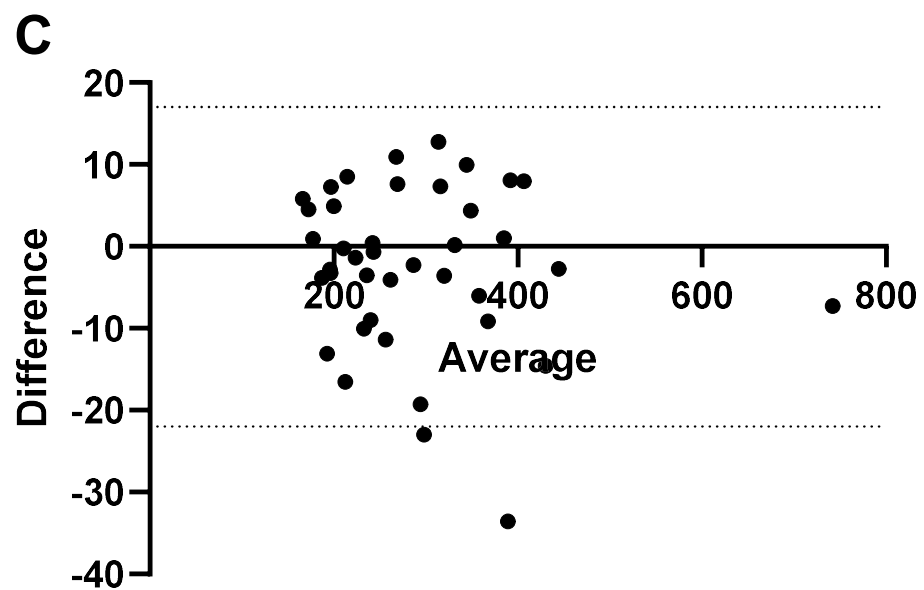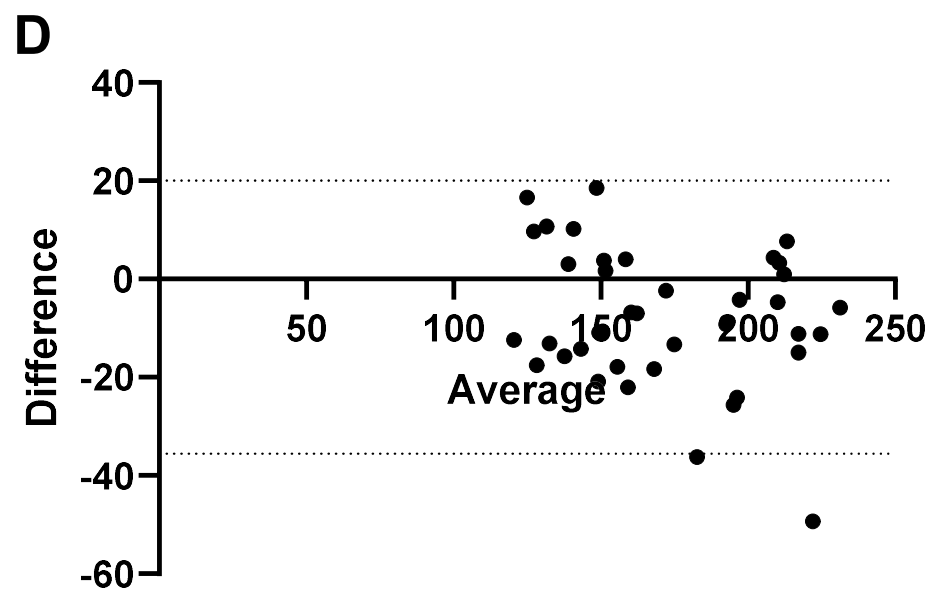

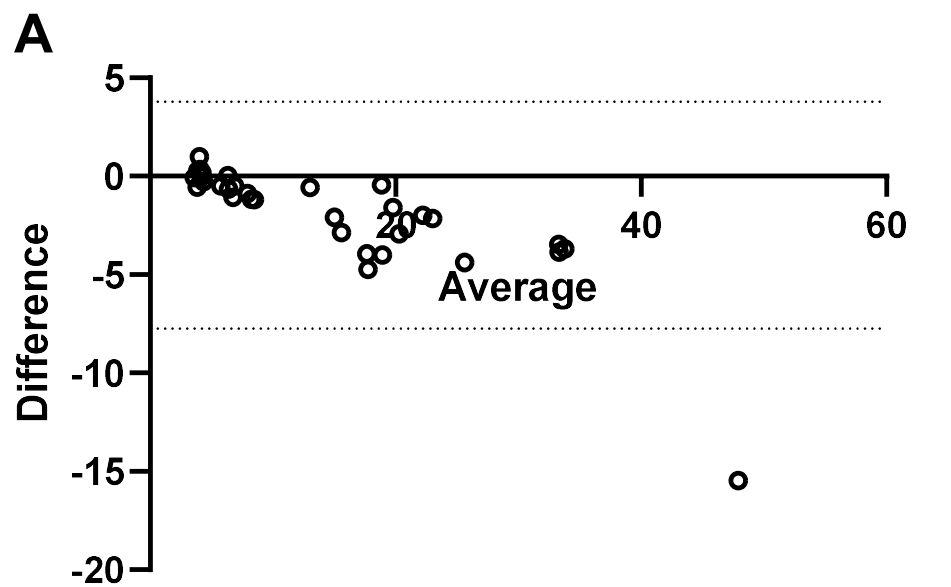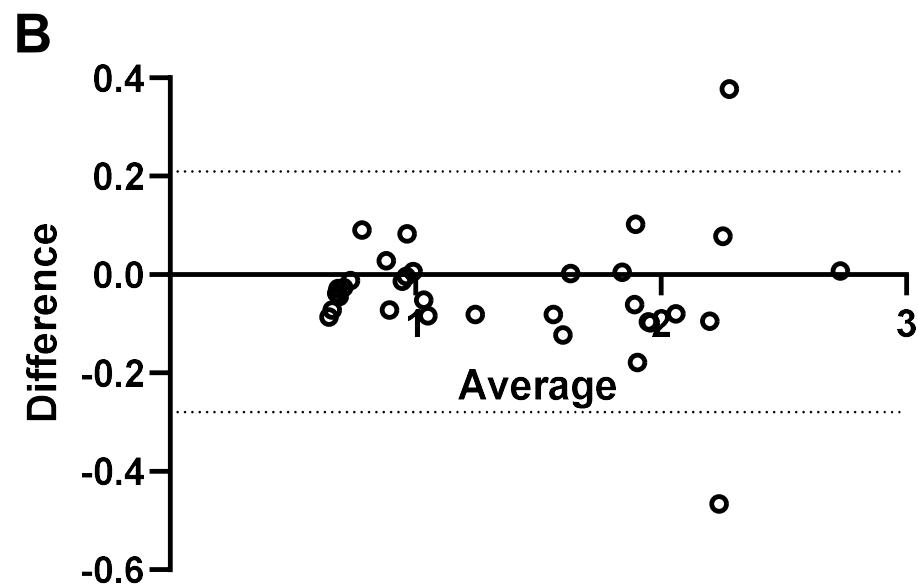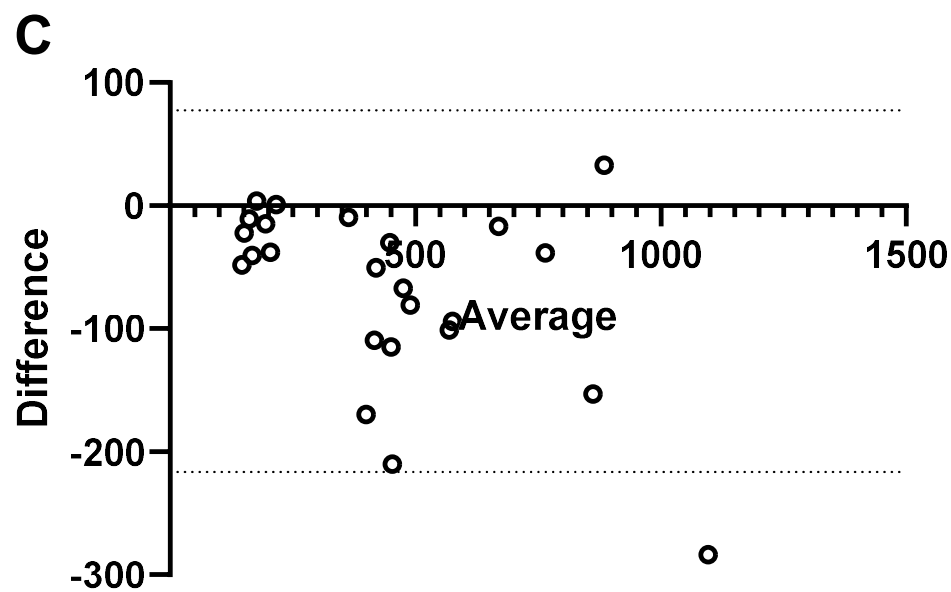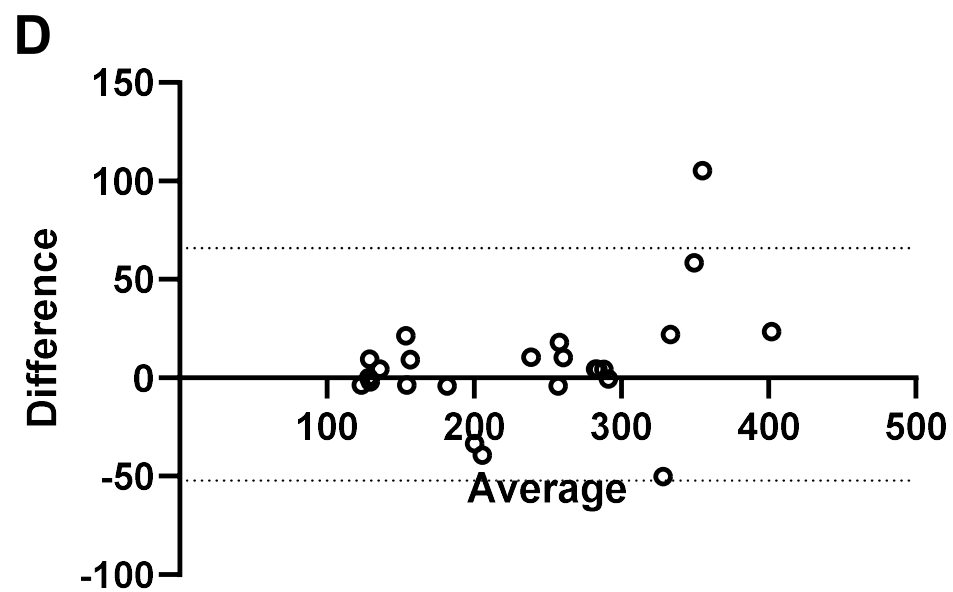

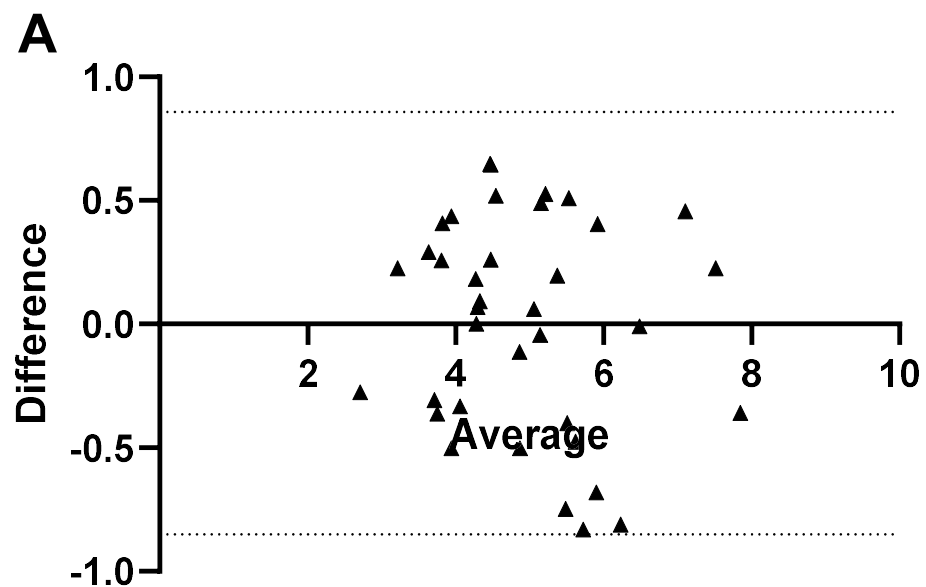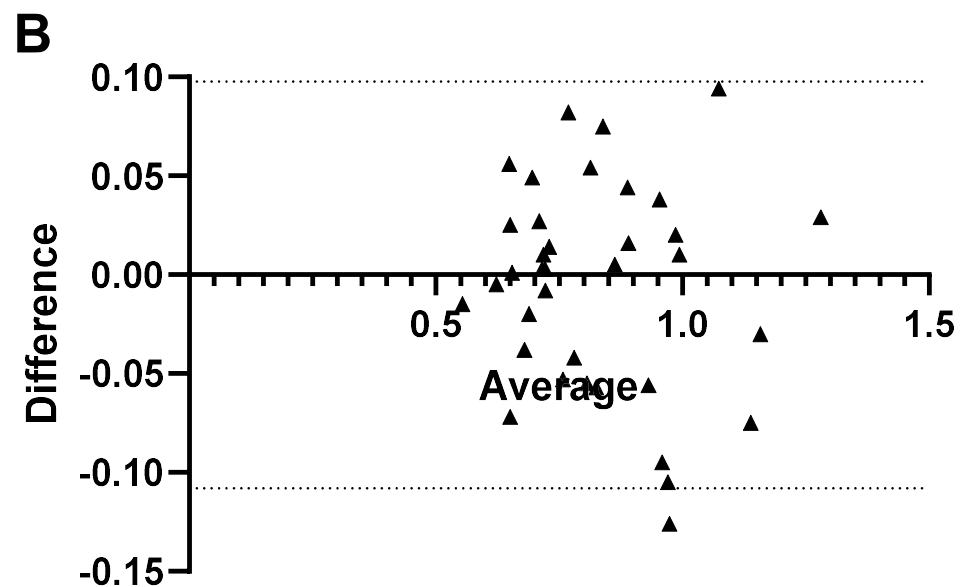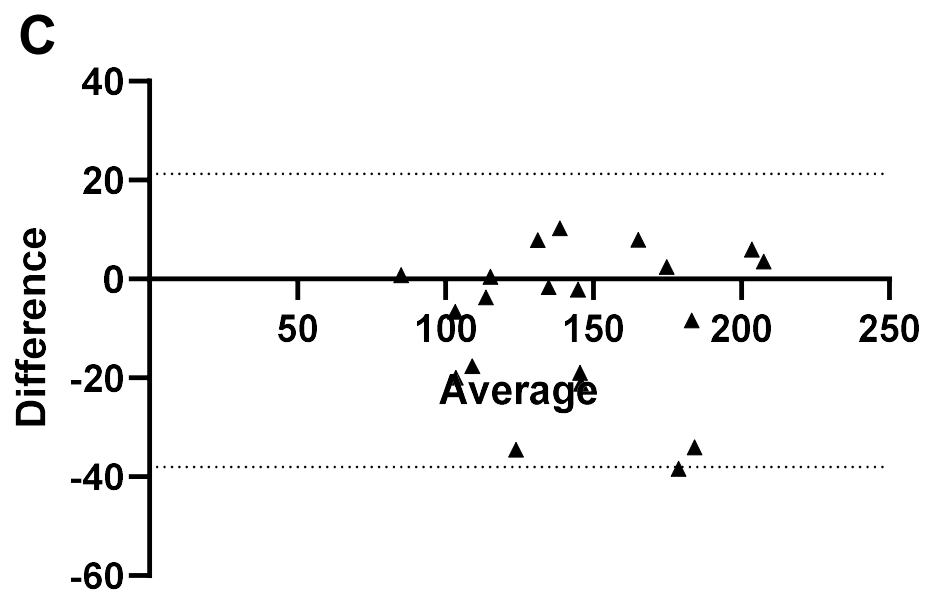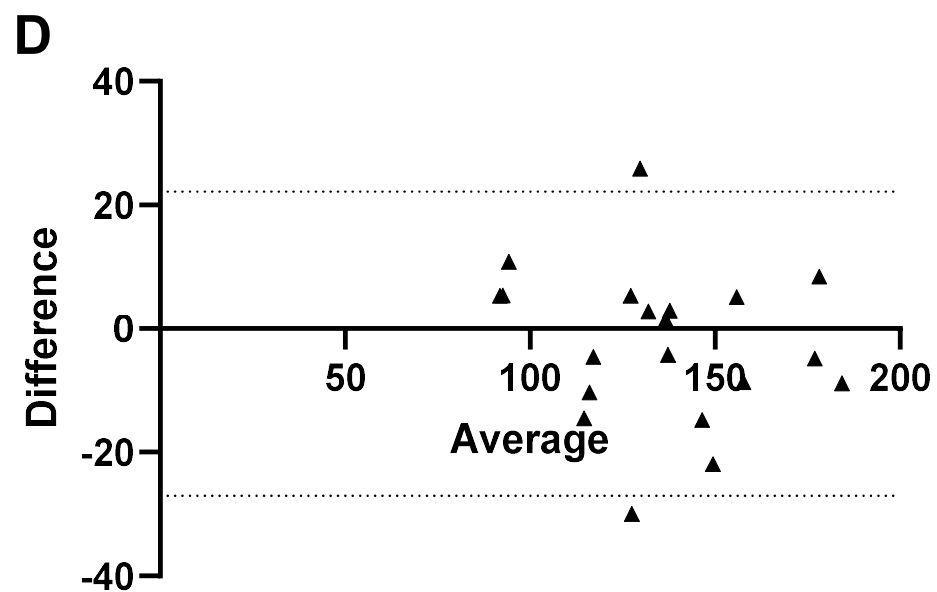

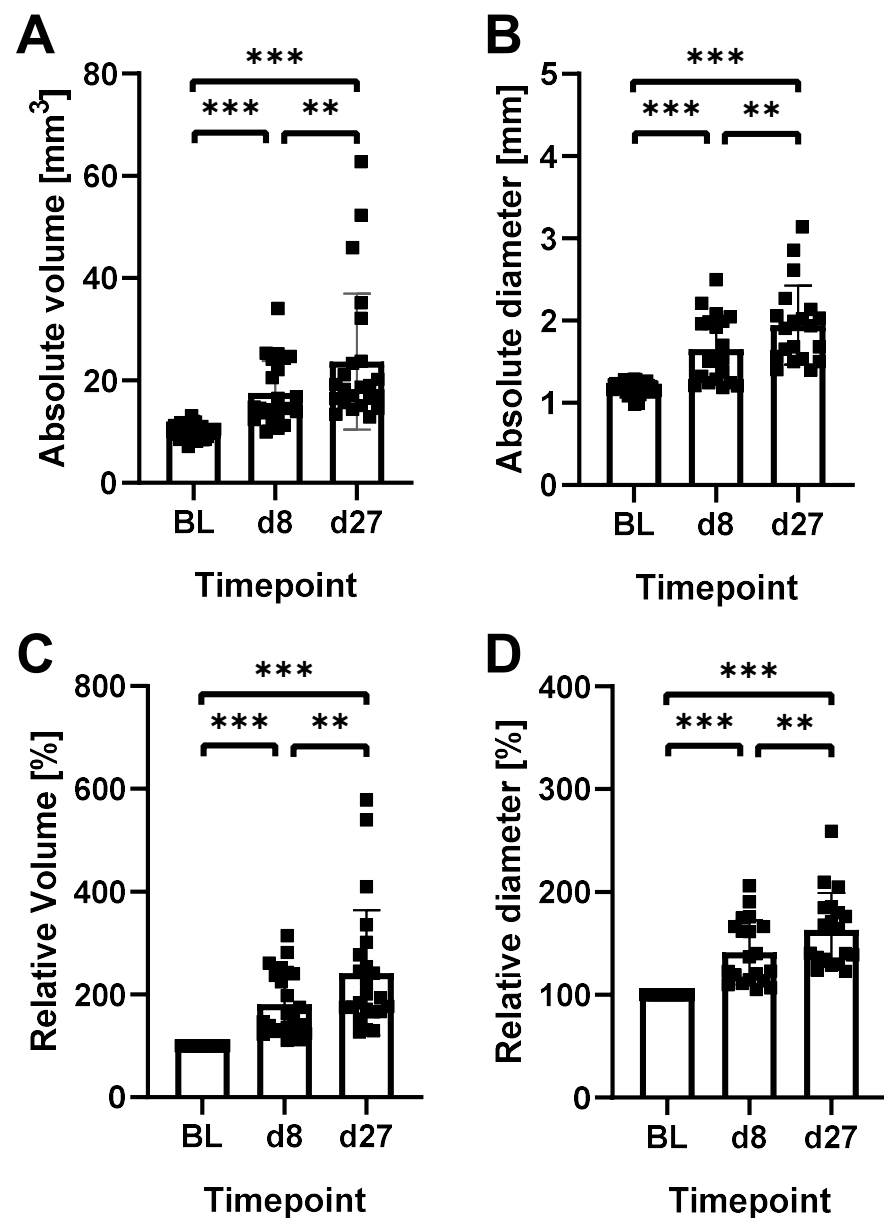

| LMEM     | P-value | Beta  | Lower 95% CI | Upper 95% CI | Random effect |
|----------|---------|-------|--------------|--------------|---------------|
| <i>A</i> | < 0.001 | 0.492 | 0.359        | 0.625        | 15.416        |
| <i>B</i> | < 0.001 | 0.027 | 0.021        | 0.033        | 0.027         |
| <i>C</i> | < 0.001 | 5.062 | 3.787        | 6.337        | 1143.39       |
| <i>D</i> | < 0.001 | 2.266 | 1.763        | 2.770        | 105.76        |

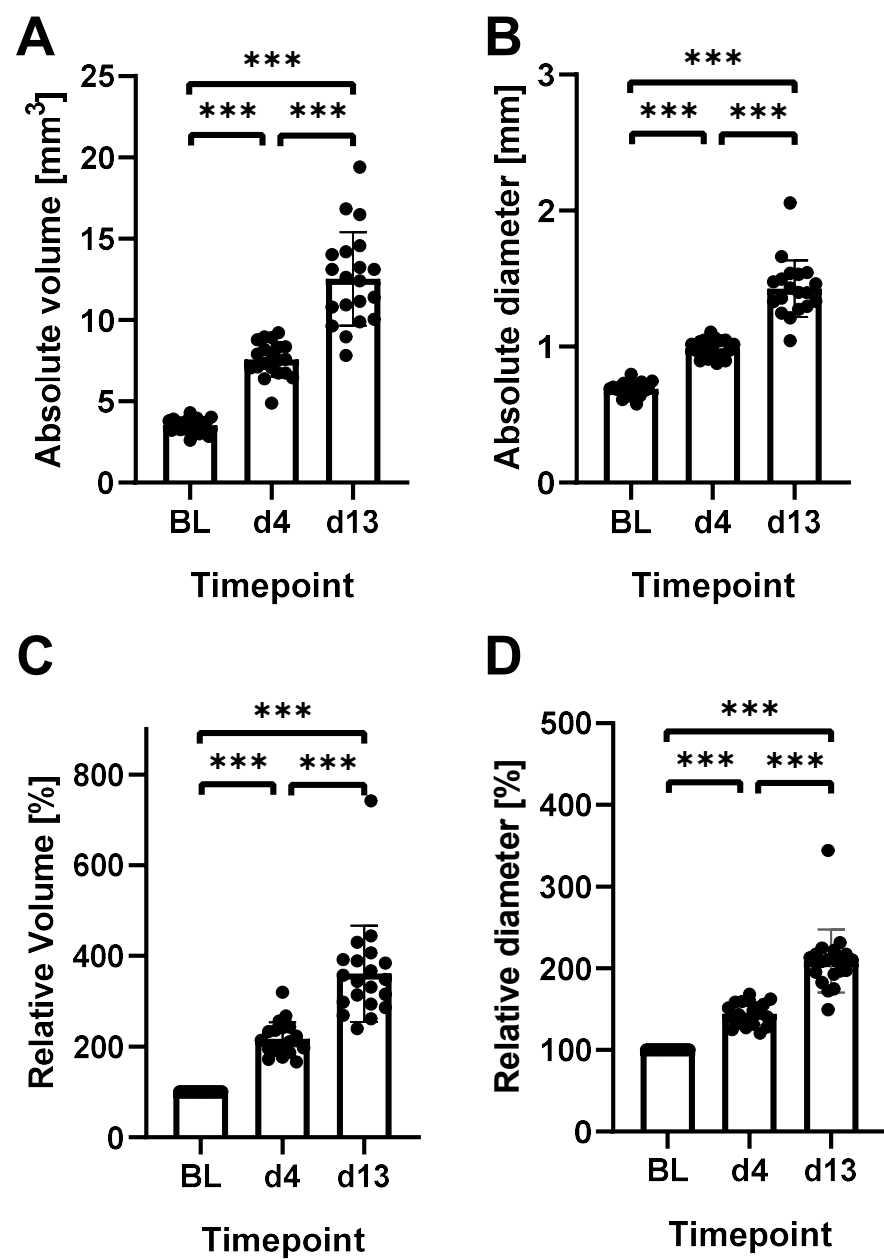

| LMEM     | P-value | Beta   | Lower 95% CI | Upper 95% CI | Random effect |
|----------|---------|--------|--------------|--------------|---------------|
| <i>A</i> | < 0.001 | 0.669  | 0.588        | 0.750        | 0.662         |
| <i>B</i> | < 0.001 | 0.055  | 0.049        | 0.062        | 0.000         |
| <i>C</i> | < 0.001 | 19.369 | 16.527       | 22.212       | 949.06        |
| <i>D</i> | < 0.001 | 8.184  | 7.128        | 9.240        | 100.02        |

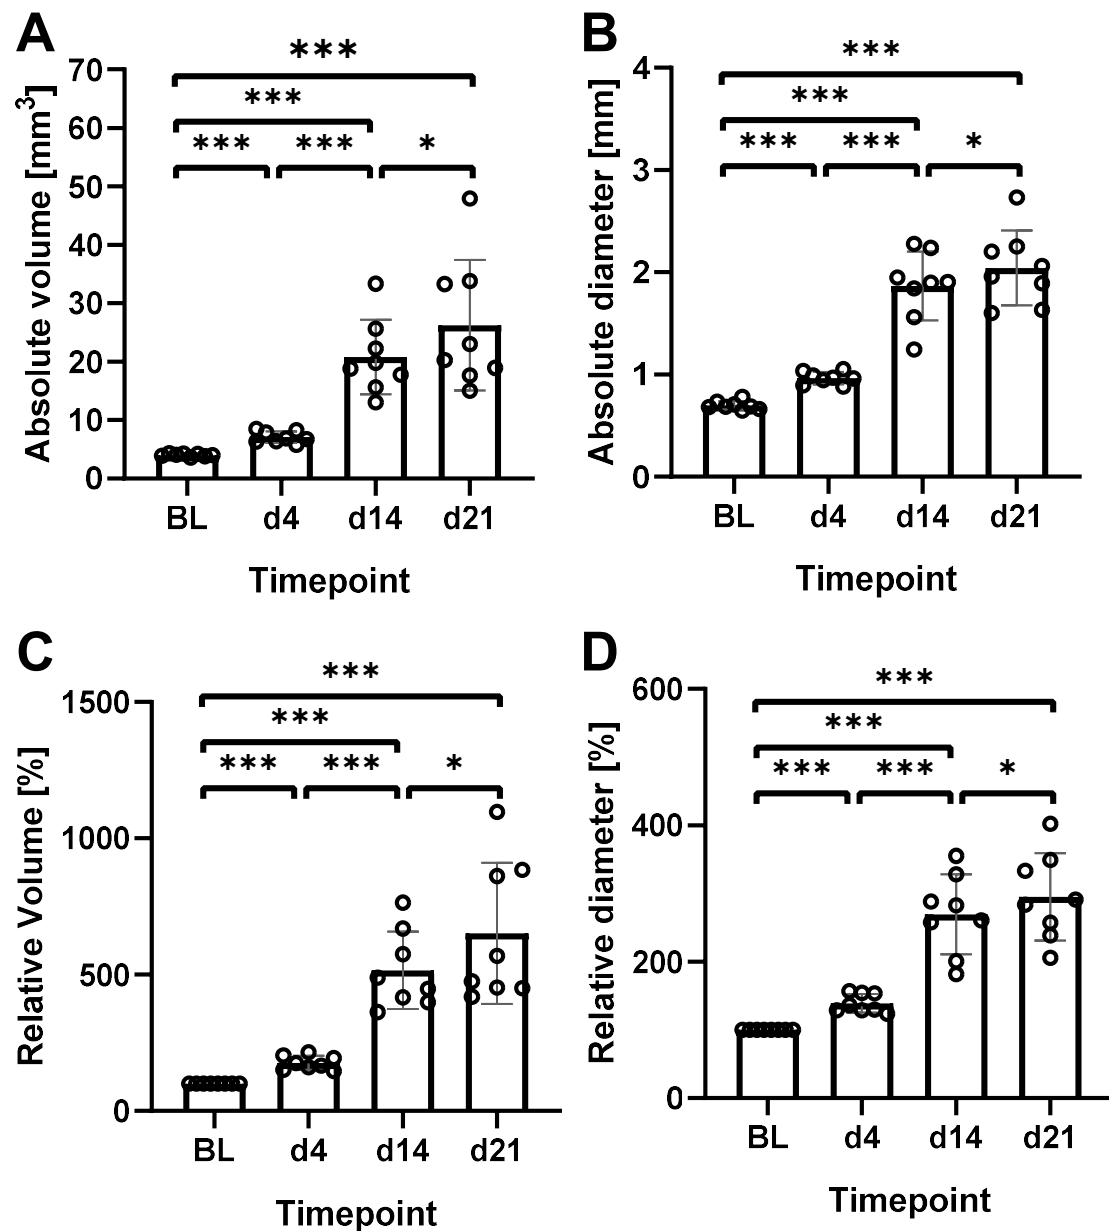

| LMEM     | P-value | Beta   | Lower 95% CI | Upper 95% CI | Random effect |
|----------|---------|--------|--------------|--------------|---------------|
| <i>A</i> | < 0.001 | 1.113  | 0.886        | 1.339        | 14.745        |
| <i>B</i> | < 0.001 | 0.068  | 0.057        | 0.078        | 0.016         |
| <i>C</i> | < 0.001 | 27.596 | 22.320       | 32.872       | 7435.82       |
| <i>D</i> | < 0.001 | 9.872  | 8.216        | 11.527       | 723.53        |

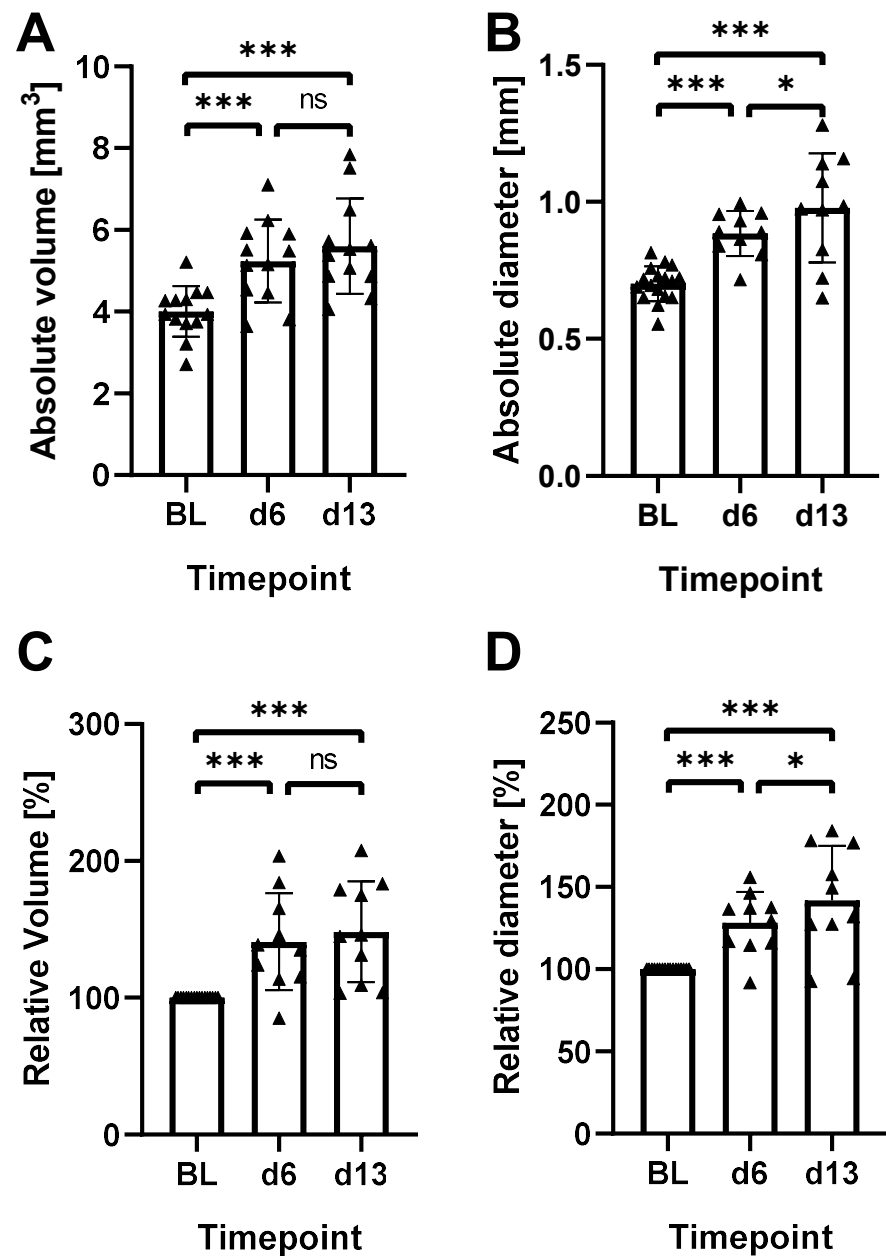

| LMEM     | P-value | Beta  | Lower 95% CI | Upper 95% CI | Random effect |
|----------|---------|-------|--------------|--------------|---------------|
| <i>A</i> | < 0.001 | 0.135 | 0.085        | 0.185        | 0.207         |
| <i>B</i> | < 0.001 | 0.022 | 0.015        | 0.028        | 0.003         |
| <i>C</i> | < 0.001 | 3.786 | 2.330        | 5.243        | 224.40        |
| <i>D</i> | < 0.001 | 3.268 | 2.203        | 4.333        | 110.02        |

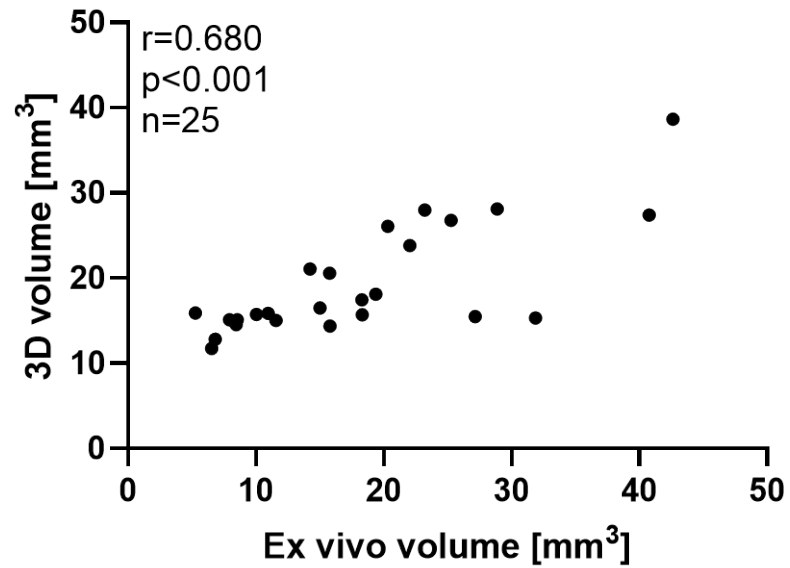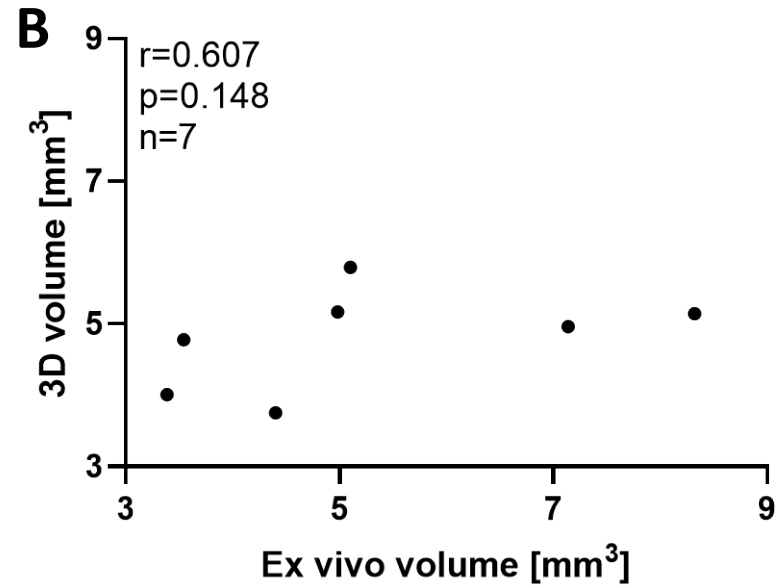

Supplement: Data_Sheet_1.pdf [file Data_Sheet_1.pdf]
